# Supplementary material
Source: MDPI journal article supplement (https://www.mdpi.com/2073-4441/12/12/3573)
Supplement: s1 [file s1]

## Supplementary Information

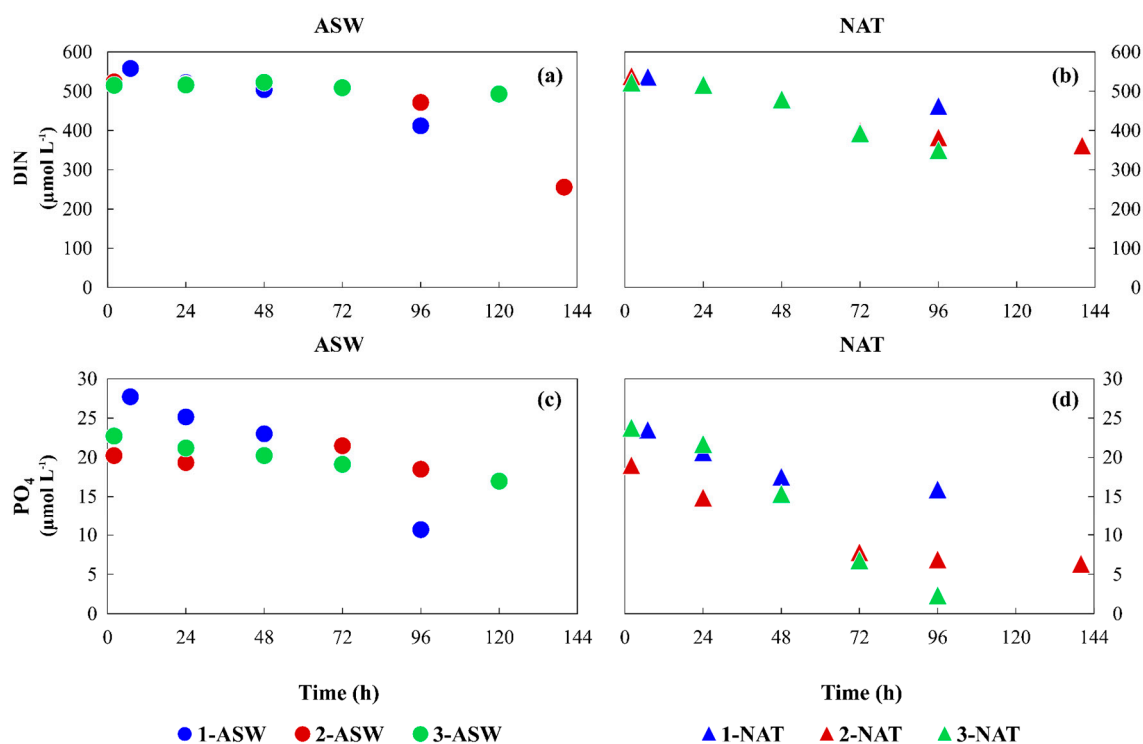

**Figure S1.** Time variation of (a,b) dissolved inorganic nitrogen (DIN) and (c,d) phosphate ( $\text{PO}_4$ ) during the three *T. rotula* culture experiments. Circles represent the artificial seawater medium (ASW) and triangles the natural seawater medium (NAT). Blue symbols represent the first experiment (EXP-1), red the second experiment (EXP-2), green the third experiment (EXP-3).

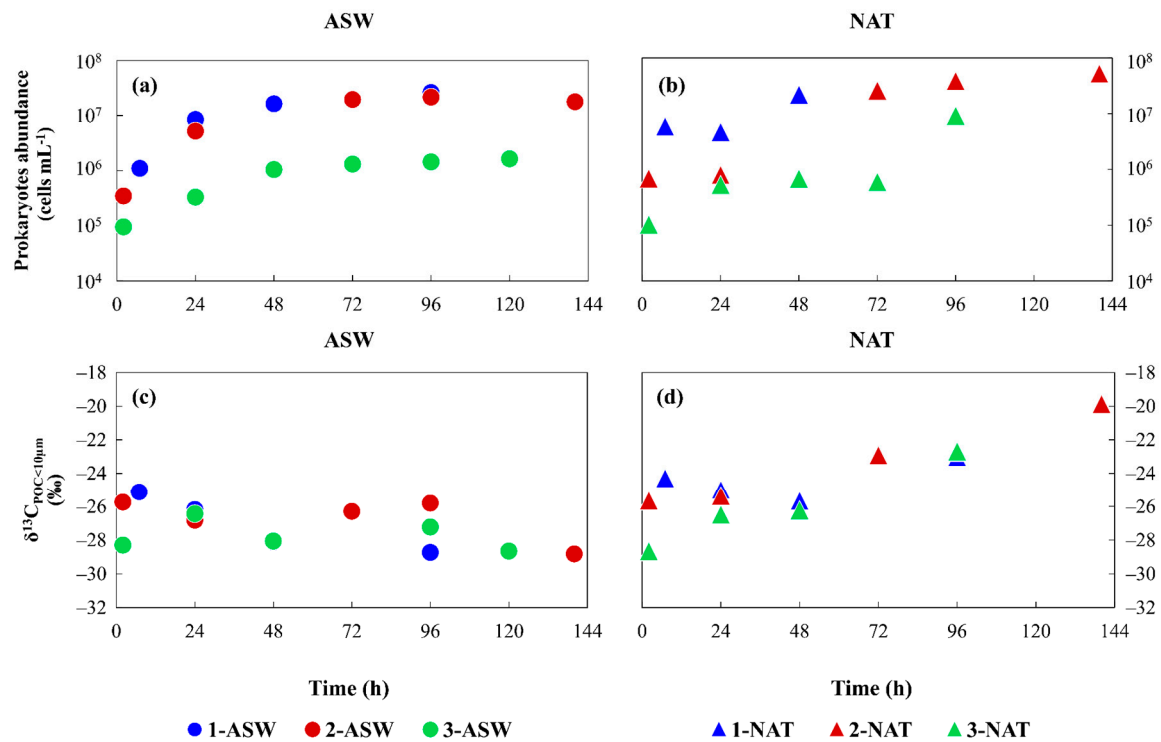

**Figure S2.** Time variation of prokaryotes abundance (a,b) and isotopic composition ( $\delta^{13}\text{C}_{\text{POC}<10\mu\text{m}}$ ; c,d) during the three *T. rotula* culture experiments of culture. Circles represent the artificial seawater medium (ASW) and triangles the natural seawater medium (NAT). Blue symbols represent the first experiment (EXP-1), red the second experiment (EXP-2), green the third experiment (EXP-3). Prokaryotes abundance is shown in a logarithmic scale.
